# Supplementary material for: Spatial and temporal fluctuations in COVID-19 fatality rates in Brazilian hospitals
Source: PubMed Central journal article supplement (PMC9307484; doi:10.1038/s41591-022-01807-1), 2022-05-10
Supplement: 41591_2022_1807_MOESM1_ESM.pdf [file 41591_2022_1807_MOESM1_ESM.pdf]

**Supplementary information**

---

**Spatial and temporal fluctuations in  
COVID-19 fatality rates in Brazilian  
hospitals**

---

In the format provided by the  
authors and unedited

Supplementary Tables and Figures to

Spatial and temporal fluctuations in COVID-19 fatality  
rates in Brazilian hospitals

Brizzi et. al.

| State capital  | State               | Observation period |            | SARS-CoV-2 Gamma variant               |                            |
|----------------|---------------------|--------------------|------------|----------------------------------------|----------------------------|
|                |                     | Start              | End        | Estimated emergence (posterior median) | First detection (observed) |
| Belo Horizonte | Minas Gerais        | 06/04/2020         | 26/07/2021 | 15/02/2021                             | 15/12/2020                 |
| Curitiba       | Paraná              | 02/03/2020         | 26/07/2021 | 26/01/2021                             | 22/10/2020                 |
| Florianópolis  | Santa Catarina      | 09/03/2020         | 26/07/2021 | 08/01/2021                             | 11/12/2020                 |
| Goiânia        | Goiás               | 16/03/2020         | 26/07/2021 | 19/01/2021                             | 28/11/2020                 |
| João Pessoa    | Paraíba             | 09/03/2020         | 26/07/2021 | 21/01/2021                             | 20/12/2020                 |
| Macapá         | Amapá               | 30/03/2020         | 26/07/2021 | 16/01/2021                             | 14/12/2020                 |
| Manaus         | Amazonas            | 24/02/2020         | 26/07/2021 | 04/12/2020                             | 04/12/2020                 |
| Natal          | Rio Grande do Norte | 16/03/2020         | 26/07/2021 | 26/01/2021                             | 06/12/2020                 |
| Porto Alegre   | Rio Grande do Sul   | 02/03/2020         | 26/07/2021 | 10/01/2021                             | 21/11/2020                 |
| Porto Velho    | Rondônia            | 30/03/2020         | 26/07/2021 | 18/01/2021                             | 25/12/2020                 |
| Rio de Janeiro | Rio de Janeiro      | 16/03/2020         | 26/07/2021 | 19/01/2021                             | 29/11/2020                 |
| Salvador       | Bahia               | 16/03/2020         | 26/07/2021 | 28/12/2020                             | 02/12/2020                 |
| São Luís       | Maranhão            | 24/02/2020         | 26/07/2021 | 19/01/2021                             | 04/12/2020                 |
| São Paulo      | São Paulo           | 20/01/2020         | 26/07/2021 | 01/02/2021                             | 01/11/2020                 |

Supplementary Table 1: Sampling frame of study.

| Location       | Reported COVID-19 attributable in-hospital deaths <sup>†</sup> |      |       |       | Underreporting-adjusted COVID-19 attributable in-hospital deaths <sup>‡</sup> |      |       |       |
|----------------|----------------------------------------------------------------|------|-------|-------|-------------------------------------------------------------------------------|------|-------|-------|
|                | Total                                                          | Ages |       |       | Total                                                                         | Ages |       |       |
|                |                                                                | 0-49 | 50-74 | 75+   |                                                                               | 0-49 | 50-74 | 75+   |
| Belo Horizonte | 7640                                                           | 808  | 3680  | 3152  | 7691                                                                          | 817  | 3705  | 3169  |
| Curitiba       | 7535                                                           | 1162 | 3941  | 2432  | 7535                                                                          | 1162 | 3941  | 2432  |
| Florianópolis  | 882                                                            | 85   | 441   | 356   | 892                                                                           | 86   | 446   | 360   |
| Goiânia        | 6103                                                           | 1006 | 3110  | 1987  | 6245                                                                          | 1036 | 3181  | 2028  |
| João Pessoa    | 2810                                                           | 508  | 1326  | 976   | 3635                                                                          | 674  | 1730  | 1231  |
| Macapá         | 992                                                            | 240  | 507   | 245   | 1011                                                                          | 243  | 520   | 248   |
| Manaus         | 10006                                                          | 1922 | 5390  | 2694  | 10168                                                                         | 1961 | 5483  | 2724  |
| Natal          | 3059                                                           | 467  | 1448  | 1144  | 3512                                                                          | 561  | 1688  | 1263  |
| Porto Alegre   | 5133                                                           | 517  | 2625  | 1991  | 5265                                                                          | 541  | 2701  | 2023  |
| Porto Velho    | 2156                                                           | 468  | 1200  | 488   | 2472                                                                          | 561  | 1361  | 550   |
| Rio de Janeiro | 23398                                                          | 3116 | 11537 | 8745  | 28052                                                                         | 3947 | 13988 | 10117 |
| Salvador       | 7667                                                           | 1206 | 3754  | 2707  | 8508                                                                          | 1402 | 4206  | 2900  |
| São Luís       | 2163                                                           | 372  | 1049  | 742   | 2546                                                                          | 428  | 1256  | 862   |
| São Paulo      | 40744                                                          | 5483 | 20301 | 14960 | 42768                                                                         | 5795 | 21302 | 15671 |

<sup>†</sup> COVID-19 attributable in-hospital deaths were defined as deaths in hospitalised unvaccinated residents with PCR confirmed or clinically diagnosed COVID-19 infection, or severe respiratory infection with no other confirmed cause. Data capture admissions and deaths until 26 July 2021.

<sup>‡</sup> To reported counts were added expected fatal outcomes in COVID-19 attributable hospital admissions in unvaccinated residents with unreported outcomes (see Methods).

Supplementary Table 2: Reported and underreporting-adjusted COVID-19 attributable in-hospital deaths.

| City           | Longest observed duration of COVID-19 in-hospital fatality rates above 50%<br>(in weeks, by age group shown in years) |       |       |       |       |       |       |       |       |       |     |
|----------------|-----------------------------------------------------------------------------------------------------------------------|-------|-------|-------|-------|-------|-------|-------|-------|-------|-----|
|                | 0-15                                                                                                                  | 16-29 | 30-39 | 40-49 | 50-59 | 60-69 | 70-74 | 75-79 | 80-84 | 85-89 | 90+ |
| Belo Horizonte | 0                                                                                                                     | 0     | 0     | 0     | 0     | 0     | 0     | 0     | 0     | 0     | 0   |
| Curitiba       | 0                                                                                                                     | 0     | 0     | 0     | 0     | 0     | 3     | 0     | 2     | 0     | 6   |
| Florianópolis  | 0                                                                                                                     | 0     | 0     | 0     | 0     | 0     | 0     | 8     | 7     | 5     | 14  |
| Goiânia        | 0                                                                                                                     | 0     | 0     | 0     | 0     | 0     | 7     | 9     | 12    | 22    | 32  |
| João Pessoa    | 0                                                                                                                     | 0     | 0     | 0     | 0     | 2     | 8     | 18    | 44    | 24    | 19  |
| Macapá         | 0                                                                                                                     | 7     | 0     | 8     | 9     | 11    | 14    | 18    | 23    | 53    | 31  |
| Manaus         | 0                                                                                                                     | 0     | 0     | 1     | 4     | 9     | 10    | 14    | 51    | 26    | 51  |
| Natal          | 0                                                                                                                     | 0     | 0     | 0     | 1     | 24    | 16    | 25    | 30    | 48    | 47  |
| Porto Alegre   | 0                                                                                                                     | 0     | 0     | 0     | 0     | 6     | 9     | 10    | 12    | 56    | 62  |
| Porto Velho    | 0                                                                                                                     | 0     | 0     | 0     | 0     | 8     | 25    | 30    | 16    | 48    | 64  |
| Rio de Janeiro | 0                                                                                                                     | 0     | 0     | 0     | 0     | 0     | 12    | 52    | 72    | 72    | 70  |
| Salvador       | 0                                                                                                                     | 0     | 0     | 0     | 1     | 0     | 9     | 10    | 13    | 28    | 29  |
| São Luís       | 1                                                                                                                     | 0     | 0     | 0     | 0     | 1     | 2     | 14    | 11    | 17    | 12  |
| São Paulo      | 0                                                                                                                     | 1     | 0     | 0     | 0     | 4     | 7     | 2     | 8     | 20    | 20  |

Supplementary Table 3: Longest observed duration of COVID-19 in-hospital fatality rates above 50%.

|                            | Date       | Healthcare resources per 100,000 population <sup>†</sup> |              |               |                |             |           |           |
|----------------------------|------------|----------------------------------------------------------|--------------|---------------|----------------|-------------|-----------|-----------|
|                            |            | Belo Horizonte                                           | Curitiba     | Florianópolis | Goiânia        | João Pessoa | Macapá    | Manaus    |
| Intensive Care Specialists | March 2020 | 2                                                        | 3            | 3             | 2              | 7           | 0         | 2         |
|                            | July 2021  | 2 (0%)                                                   | 3 (0%)       | 4 (33%)       | 2 (0%)         | 6 (-14%)    | 0         | 2 (0%)    |
| Nurses                     | March 2020 | 249                                                      | 185          | 251           | 151            | 212         | 129       | 114       |
|                            | July 2021  | 306 (23%)                                                | 228 (23%)    | 299 (19%)     | 180 (19%)      | 238 (12%)   | 164 (27%) | 152 (33%) |
| Physicians                 | March 2020 | 631                                                      | 482          | 615           | 368            | 309         | 124       | 155       |
|                            | July 2021  | 674 (7%)                                                 | 520 (8%)     | 686 (12%)     | 394 (7%)       | 345 (12%)   | 139 (12%) | 166 (7%)  |
| Physiotherapists           | March 2020 | 74                                                       | 65           | 86            | 50             | 76          | 47        | 19        |
|                            | July 2021  | 92 (24%)                                                 | 84 (29%)     | 117 (36%)     | 59 (18%)       | 90 (18%)    | 56 (19%)  | 29 (53%)  |
| Nurse assistants           | March 2020 | 584                                                      | 356          | 479           | 371            | 309         | 318       | 290       |
|                            | July 2021  | 723 (24%)                                                | 491 (38%)    | 601 (25%)     | 427 (15%)      | 367 (19%)   | 350 (10%) | 328 (13%) |
| CC Beds                    | March 2020 | 41                                                       | 41           | 35            | 51             | 27          | 10        | 11        |
|                            | July 2021  | 56 (37%)                                                 | 63 (54%)     | 54 (54%)      | 86 (69%)       | 59 (119%)   | 28 (180%) | 28 (155%) |
| CC Beds with ventilator    | March 2020 | 40                                                       | 41           | 30            | 36             | 23          | 9         | 11        |
|                            | July 2021  | 55 (38%)                                                 | 62 (51%)     | 51 (70%)      | 70 (94%)       | 54 (135%)   | 25 (178%) | 26 (136%) |
| ICU Beds                   | March 2020 | 34                                                       | 33           | 24            | 32             | 22          | 6         | 9         |
|                            | July 2021  | 48 (41%)                                                 | 56 (70%)     | 46 (92%)      | 66 (106%)      | 51 (132%)   | 22 (267%) | 24 (167%) |
| Ventilators                | March 2020 | 83                                                       | 79           | 86            | 77             | 57          | 21        | 38        |
|                            | July 2021  | 101 (22%)                                                | 112 (42%)    | 108 (26%)     | 113 (47%)      | 87 (53%)    | 41 (95%)  | 58 (53%)  |
|                            |            | Natal                                                    | Porto Alegre | Porto Velho   | Rio de Janeiro | Salvador    | São Luís  | São Paulo |
| Intensive Care Specialists | March 2020 | 4                                                        | 6            | 2             | 5              | 6           | 1         | 3         |
|                            | July 2021  | 4 (0%)                                                   | 6 (0%)       | 2 (0%)        | 6 (20%)        | 7 (17%)     | 2 (100%)  | 4 (33%)   |
| Nurses                     | March 2020 | 162                                                      | 290          | 168           | 185            | 229         | 223       | 183       |
|                            | July 2021  | 201 (24%)                                                | 334 (15%)    | 250 (49%)     | 228 (23%)      | 265 (16%)   | 258 (16%) | 219 (20%) |
| Physicians                 | March 2020 | 313                                                      | 626          | 237           | 299            | 329         | 207       | 324       |
|                            | July 2021  | 348 (11%)                                                | 654 (4%)     | 293 (24%)     | 326 (9%)       | 344 (5%)    | 229 (11%) | 358 (10%) |
| Physiotherapists           | March 2020 | 43                                                       | 67           | 44            | 35             | 73          | 53        | 41        |
|                            | July 2021  | 55 (28%)                                                 | 79 (18%)     | 76 (73%)      | 41 (17%)       | 80 (10%)    | 71 (34%)  | 55 (34%)  |
| Nurse assistants           | March 2020 | 378                                                      | 624          | 461           | 291            | 374         | 497       | 214       |
|                            | July 2021  | 451 (19%)                                                | 868 (39%)    | 608 (32%)     | 422 (45%)      | 432 (16%)   | 569 (14%) | 271 (27%) |
| CC Beds                    | March 2020 | 41                                                       | 55           | 37            | 44             | 55          | 37        | 37        |
|                            | July 2021  | 68 (66%)                                                 | 88 (60%)     | 86 (132%)     | 56 (27%)       | 67 (22%)    | 58 (57%)  | 52 (41%)  |
| CC Beds with ventilator    | March 2020 | 36                                                       | 53           | 35            | 38             | 46          | 33        | 30        |
|                            | July 2021  | 63 (75%)                                                 | 86 (62%)     | 82 (134%)     | 50 (32%)       | 63 (37%)    | 48 (45%)  | 48 (60%)  |
| ICU Beds                   | March 2020 | 27                                                       | 45           | 31            | 22             | 42          | 24        | 18        |
|                            | July 2021  | 53 (96%)                                                 | 82 (82%)     | 78 (152%)     | 31 (41%)       | 60 (43%)    | 37 (54%)  | 37 (106%) |
| Ventilators                | March 2020 | 75                                                       | 102          | 68            | 72             | 83          | 65        | 66        |
|                            | July 2021  | 123 (64%)                                                | 156 (53%)    | 147 (116%)    | 94 (31%)       | 109 (31%)   | 87 (34%)  | 86 (30%)  |

<sup>†</sup> Numbers summarise healthcare facility level microdata on personnel (nurses, nurse assistants, physiotherapists, physicians and intensive care specialists), and reported equipment (critical care beds, ICU beds, ventilators) from Brazil's National Register of Health Facilities (Cadastro Nacional de Estabelecimentos de Saúde - CNES); see Methods. Values in brackets give the percent increase from March 2020 to July 2021. CC stands for critical care.

Supplementary Table 4: Healthcare resources, March 2020 to July 2021.

| Healthcare pressure index                                                                                                                                                                                                                                                                                                                                                                                                                                                                                                                                   | Definition <sup>†</sup>                                                                                                                            | CBO family                |
|-------------------------------------------------------------------------------------------------------------------------------------------------------------------------------------------------------------------------------------------------------------------------------------------------------------------------------------------------------------------------------------------------------------------------------------------------------------------------------------------------------------------------------------------------------------|----------------------------------------------------------------------------------------------------------------------------------------------------|---------------------------|
| 3-wk SARI admissions per physician                                                                                                                                                                                                                                                                                                                                                                                                                                                                                                                          | $x_{l,w}^{\text{SARI-adm-per-physician-02}} = \left( \sum_{i=0}^2 h_{l,w+i}^{\text{SARI}} \right) / n_{l,w}^{\text{physicians}}$                   | 2231, 2251,<br>2252, 2253 |
| 3-wk ICU admissions per physiotherapist                                                                                                                                                                                                                                                                                                                                                                                                                                                                                                                     | $x_{l,w}^{\text{ICU-adm-per-physiotherapist-02}} = \left( \sum_{i=0}^2 h_{l,w+i}^{\text{ICU}} \right) / n_{l,w}^{\text{physiotherapists}}$         | 2236                      |
| 3-wk ICU admissions per physician                                                                                                                                                                                                                                                                                                                                                                                                                                                                                                                           | $x_{l,w}^{\text{ICU-adm-per-physician-02}} = \left( \sum_{i=0}^2 h_{l,w+i}^{\text{ICU}} \right) / n_{l,w}^{\text{physicians}}$                     | 2231, 2251,<br>2252, 2253 |
| 3-wk ICU admissions per nurse assistant                                                                                                                                                                                                                                                                                                                                                                                                                                                                                                                     | $x_{l,w}^{\text{ICU-adm-per-nurse-assist-02}} = \left( \sum_{i=0}^2 h_{l,w+i}^{\text{ICU}} \right) / n_{l,w}^{\text{nurse-assist}}$                | 3222                      |
| 3-wk ICU admissions per nurse                                                                                                                                                                                                                                                                                                                                                                                                                                                                                                                               | $x_{l,w}^{\text{ICU-adm-per-nurse-02}} = \left( \sum_{i=0}^2 h_{l,w+i}^{\text{ICU}} \right) / n_{l,w}^{\text{nurses}}$                             | 2235                      |
| 3-wk ICU admissions per intensive care specialist                                                                                                                                                                                                                                                                                                                                                                                                                                                                                                           | $x_{l,w}^{\text{ICU-adm-per-intensivist-02}} = \left( \sum_{i=0}^2 h_{l,w+i}^{\text{ICU}} \right) / n_{l,w}^{\text{intensivist}}$                  | 225150                    |
|                                                                                                                                                                                                                                                                                                                                                                                                                                                                                                                                                             |                                                                                                                                                    | CNES code                 |
| 3-wk SARI admissions per ventilator                                                                                                                                                                                                                                                                                                                                                                                                                                                                                                                         | $x_{l,w}^{\text{SARI-adm-per-ventilator-02}} = \left( \sum_{i=0}^2 h_{l,w+i}^{\text{SARI}} \right) / n_{l,w}^{\text{ventilators}}$                 | 64                        |
| 3-wk SARI admissions per critical care bed with ventilator                                                                                                                                                                                                                                                                                                                                                                                                                                                                                                  | $x_{l,w}^{\text{SARI-adm-per-crit-care-bed-vent-02}} = \left( \sum_{i=0}^2 h_{l,w+i}^{\text{SARI}} \right) / n_{l,w}^{\text{crit-care-beds-vent}}$ | 64, 95                    |
| 3-wk SARI admissions per critical care bed                                                                                                                                                                                                                                                                                                                                                                                                                                                                                                                  | $x_{l,w}^{\text{SARI-adm-per-crit-care-bed-02}} = \left( \sum_{i=0}^2 h_{l,w+i}^{\text{SARI}} \right) / n_{l,w}^{\text{crit-care-beds}}$           | 51, 75,<br>76,95          |
| 3-wk ICU admissions per ventilator                                                                                                                                                                                                                                                                                                                                                                                                                                                                                                                          | $x_{l,w}^{\text{ICU-adm-per-ventilator-02}} = \left( \sum_{i=0}^2 h_{l,w+i}^{\text{ICU}} \right) / n_{l,w}^{\text{ventilators}}$                   | 64                        |
| 3-wk ICU admissions per ICU bed                                                                                                                                                                                                                                                                                                                                                                                                                                                                                                                             | $x_{l,w}^{\text{ICU-adm-per-ICU-bed-02}} = \left( \sum_{i=0}^2 h_{l,w+i}^{\text{ICU}} \right) / r_{l,w}^{\text{ICU-beds}}$                         | 51, 75, 76                |
| <sup>†</sup> Data on hospital resources were obtained from CNES <sup>(53)</sup> , and were aggregated by month and location. Data on hospital admissions were retrieved from the SIVEP-Gripe platform. Hospital personnel data were defined according to the 2002 Brazilian Classification of Occupations [Classificação Brasileira de Ocupações (CBO)], available at: <a href="https://www.ocupacoes.com.br/">https://www.ocupacoes.com.br/</a> . Hospital equipment data were defined according to the CNES code classification; see Methods for details. |                                                                                                                                                    |                           |

Supplementary Table 5: Definitions of the healthcare pressure indices.

| Week     | Manaus          |                | Belo Horizonte  |                | São Paulo       |                |
|----------|-----------------|----------------|-----------------|----------------|-----------------|----------------|
|          | Genomes sampled | Gamma positive | Genomes sampled | Gamma positive | Genomes sampled | Gamma positive |
| 27/05/20 | 2               | 0              | -               | -              | -               | -              |
| 02/11/20 | 9               | 0              | -               | -              | 1               | 0              |
| 09/11/20 | 2               | 0              | -               | -              | -               | -              |
| 16/11/20 | 4               | 0              | -               | -              | -               | -              |
| 23/11/20 | -               | -              | -               | -              | 1               | 0              |
| 30/11/20 | 2               | 1              | -               | -              | -               | -              |
| 07/12/20 | 7               | 1              | -               | -              | -               | -              |
| 14/12/20 | 24              | 7              | -               | -              | -               | -              |
| 21/12/20 | 37              | 20             | -               | -              | 4               | 0              |
| 28/12/20 | 14              | 8              | -               | -              | 2               | 0              |
| 04/01/21 | 46              | 40             | 2               | 0              | 3               | 1              |
| 11/01/21 | -               | -              | 1               | 0              | 7               | 5              |
| 18/01/21 | -               | -              | -               | -              | 7               | 2              |
| 25/01/21 | -               | -              | 2               | 0              | 3               | 1              |
| 01/02/21 | -               | -              | 3               | 0              | 1               | 0              |
| 08/02/21 | -               | -              | 1               | 0              | 2               | 1              |
| 15/02/21 | -               | -              | 3               | 0              | 14              | 10             |
| 22/02/21 | -               | -              | 1               | 0              | 10              | 9              |
| 01/03/21 | -               | -              | 37              | 11             | 5               | 5              |
| 08/03/21 | -               | -              | 24              | 16             | 6               | 6              |
| 15/03/21 | -               | -              | -               | -              | 2               | 2              |
| 22/03/21 | -               | -              | -               | -              | 7               | 6              |
| 29/03/21 | -               | -              | -               | -              | 1               | 1              |

Supplementary Table 6: SARS-CoV-2 sequence data from Manaus, Belo Horizonte, and São Paulo, obtained under controlled sequence sampling frames.

|                    | Assumed efficacy against severe infection requiring hospitalisation |                      | Notes and references                                                                                                                                                          |
|--------------------|---------------------------------------------------------------------|----------------------|-------------------------------------------------------------------------------------------------------------------------------------------------------------------------------|
|                    | 1 <sup>st</sup> dose                                                | 2 <sup>nd</sup> dose |                                                                                                                                                                               |
| Sinovac            | 31.6%                                                               | 71.4%                | Values taken from Ref. <sup>(77)</sup> , assuming vaccine effectiveness against hospitalisation is similar to effectiveness against death.                                    |
| Covishield         | 40%                                                                 | 91.4%                | Estimates based on Refs. <sup>(78,79,80)</sup> , and calibrating effectiveness against symptomatic infection against severe infection using Fig. 3A in Ref. <sup>(81)</sup> . |
| Janssen and Pfizer | 40%                                                                 | 91.4%                | No effectiveness studies found in Brazil. Janssen and Pfizer contributed to 15.07% of administered by the end of the study period. Hence, used same values as for Covishield. |

Supplementary Table 7: COVID-19 vaccine efficacy estimates in populations in which SARS-CoV-2 Gamma is circulating.



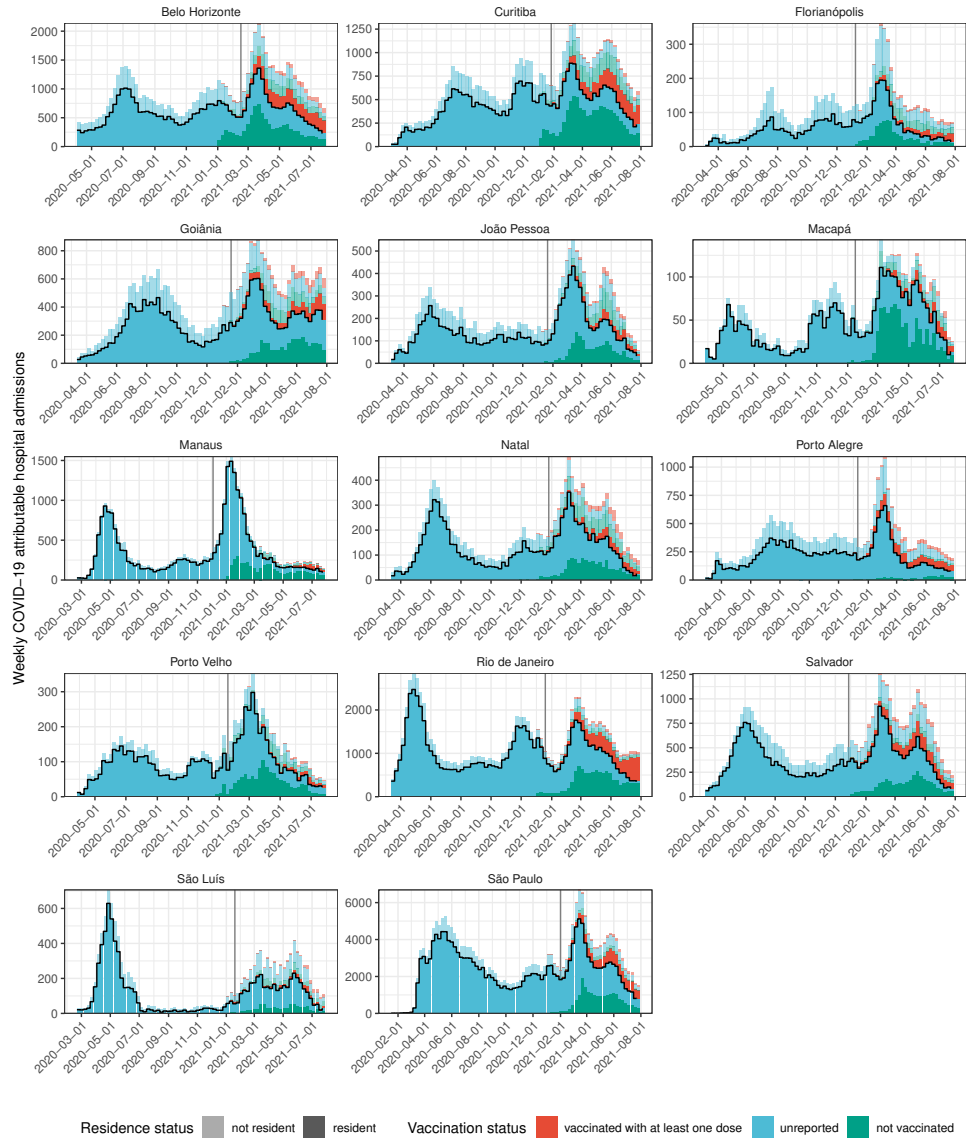

Supplementary Figure S1: COVID-19 attributable hospital admissions. Data are shown by week of admission and are stratified by residence status (lighter shade for non-residents and darker shade for residents) and vaccination status (colours) in 14 cities in Brazil. Data are from the SIVEP-Gripe platform of the Brazilian Ministry of Health and as of 31 January 2022. The black line indicates the hospitalised patients selected in this study. The grey vertical line indicates the date of Gamma’s first detection in each city.

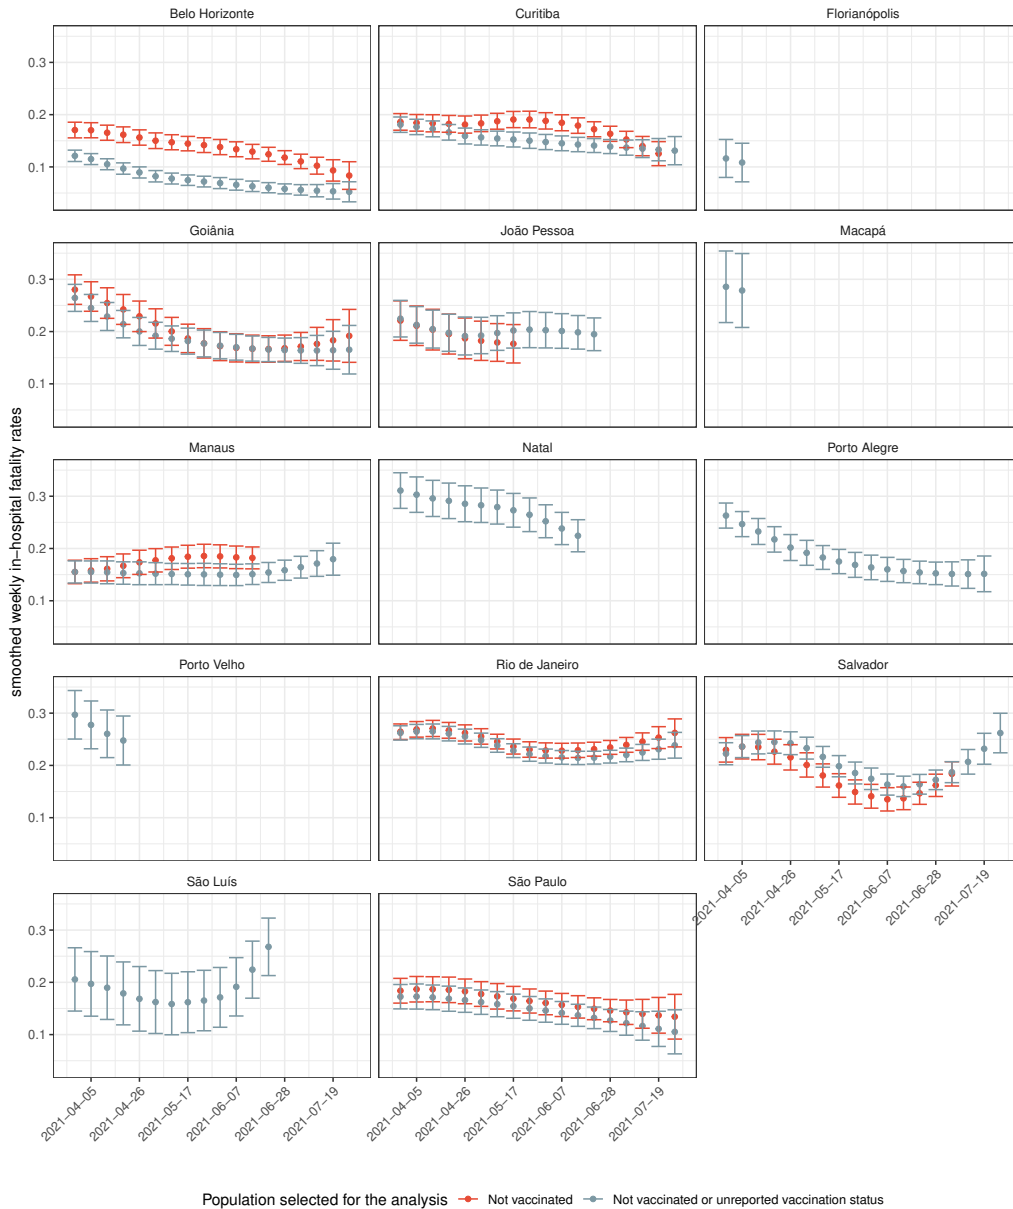

Supplementary Figure S2: Age-standardised COVID-19 fatality rates in reported unvaccinated patients only. From the denominator of COVID-19 attributable hospitalised residents, we further excluded patients with unreported vaccination status on or after March 29, 2021, and recalculated the non-parametric, smoothed estimates of age-standardised COVID-19 fatality rates. To avoid extrapolation, we only included estimates obtained prior to the last date for which there was at least one hospital admission per age group. Mean estimates (dots) are shown along with 95% confidence intervals (errorbars) for two patient groups depending on reported vaccination status (colour): patients without evidence of vaccination (n=100,746) and confirmed unvaccinated patients (n=45,422)

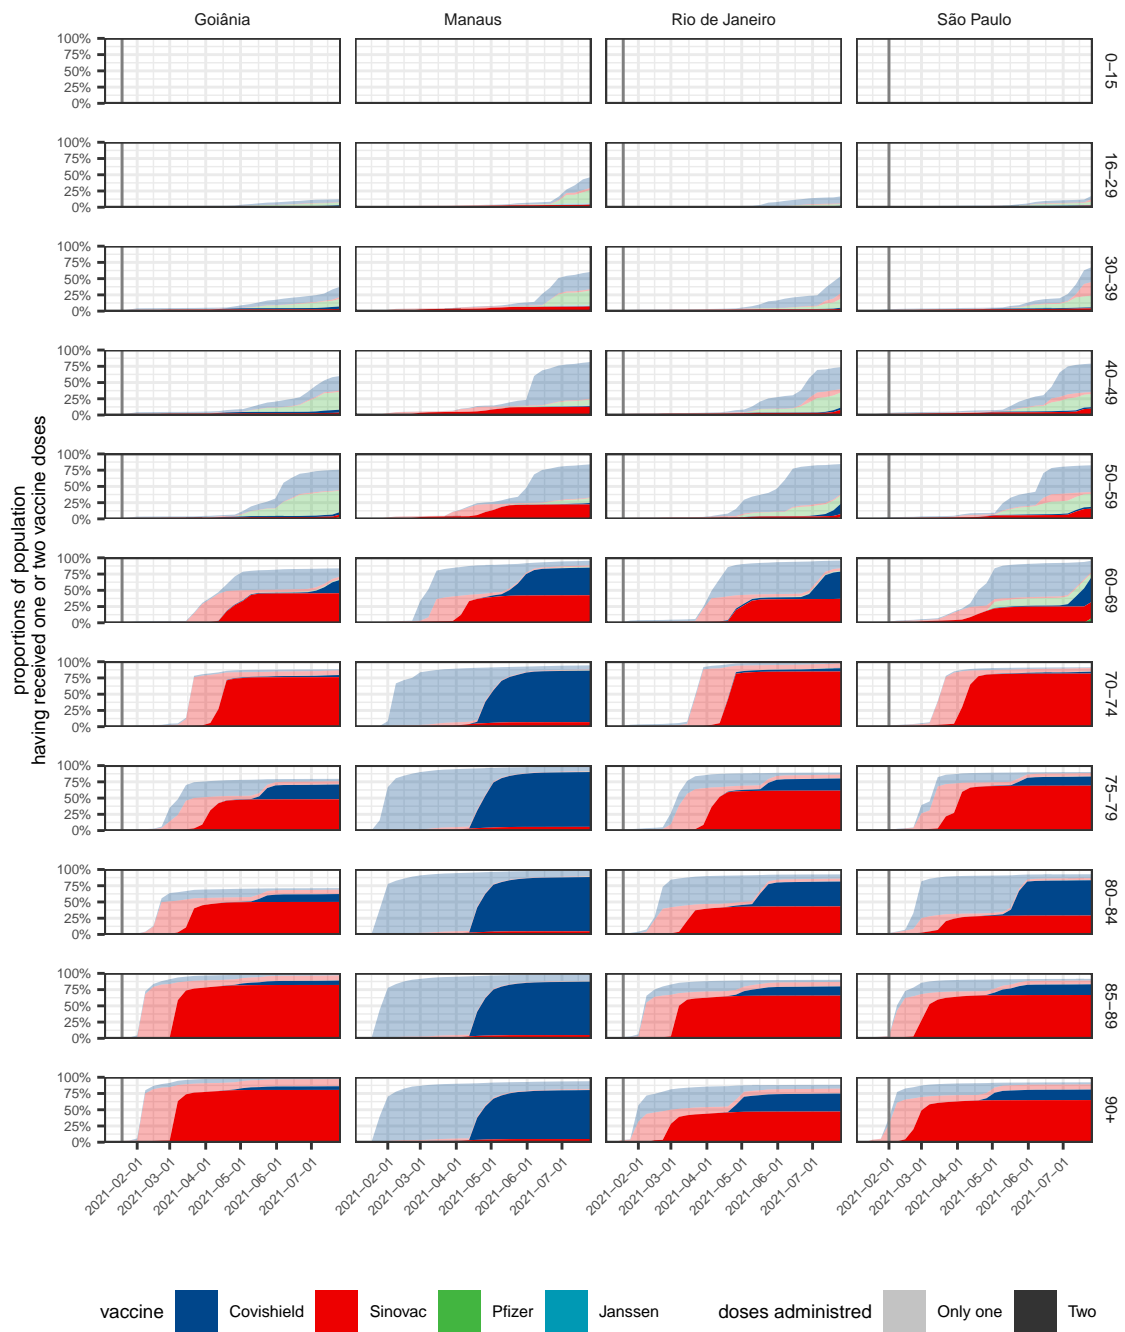

Supplementary Figure S3: COVID-19 vaccine coverage: Goiânia, Manaus, Rio de Janeiro and São Paulo. Individual-level data on administered vaccine doses from the Brazilian Ministry of Health database (<https://opendatasus.saude.gov.br/dataset/covid-19-vacinacao>) were retrieved on 5 August 2021 as described in the Methods. Estimated vaccine coverage is shown by vaccine (colour) and number of doses administered (colour intensity). The date of Gamma’s detection is added as a grey vertical line.

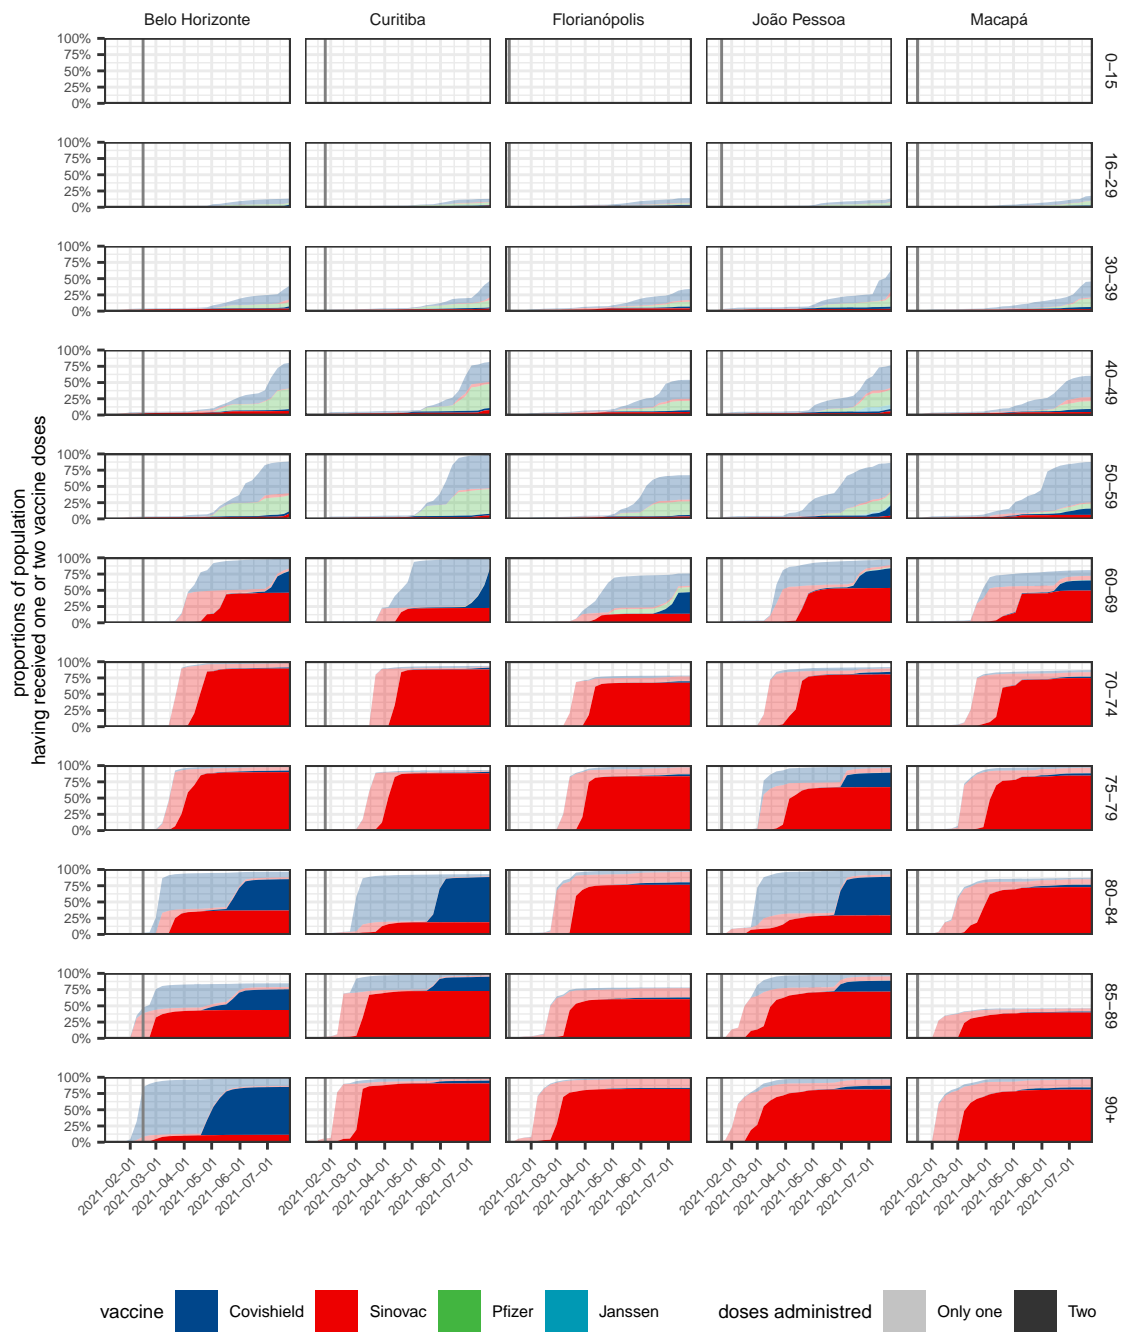

Supplementary Figure S4: COVID-19 vaccine coverage: Belo Horizonte, Curitiba, Florianópolis, João Pessoa and Macapá. Individual-level data on administered vaccine doses from the Brazilian Ministry of Health database (<https://opendatasus.saude.gov.br/dataset/covid-19-vacinacao>) were retrieved on 5 August 2021, and preprocessed as described in the Methods. Estimated vaccine coverage is shown by vaccine (colour) and number of doses administered (colour intensity). The date of Gamma’s detection is added as a grey vertical line.

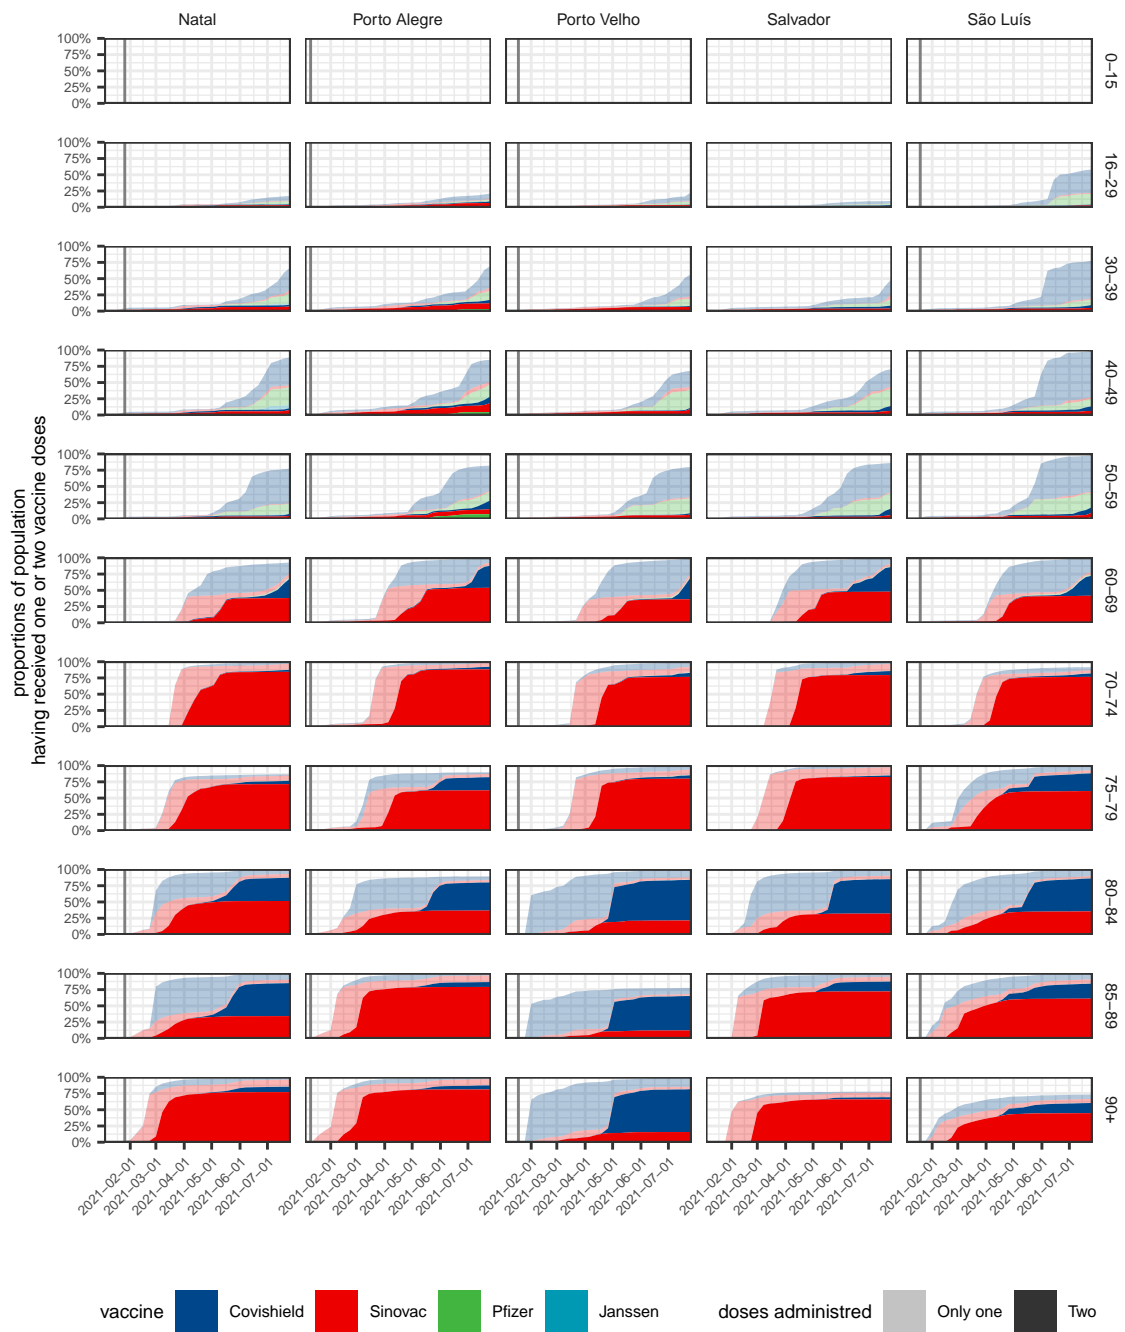

Supplementary Figure S5: COVID-19 vaccine coverage: Natal, Porto Alegre, Porto Velho, Salvador and São Luís. Individual-level data on administered vaccine doses from the Brazilian Ministry of Health database (<https://opendatasus.saude.gov.br/dataset/covid-19-vacinacao>) were retrieved on 5 August 2021, and preprocessed as described in the Methods. Estimated vaccine coverage is shown by vaccine (colour) and number of doses administered (colour intensity). The date of Gamma’s detection is added as a grey vertical line.

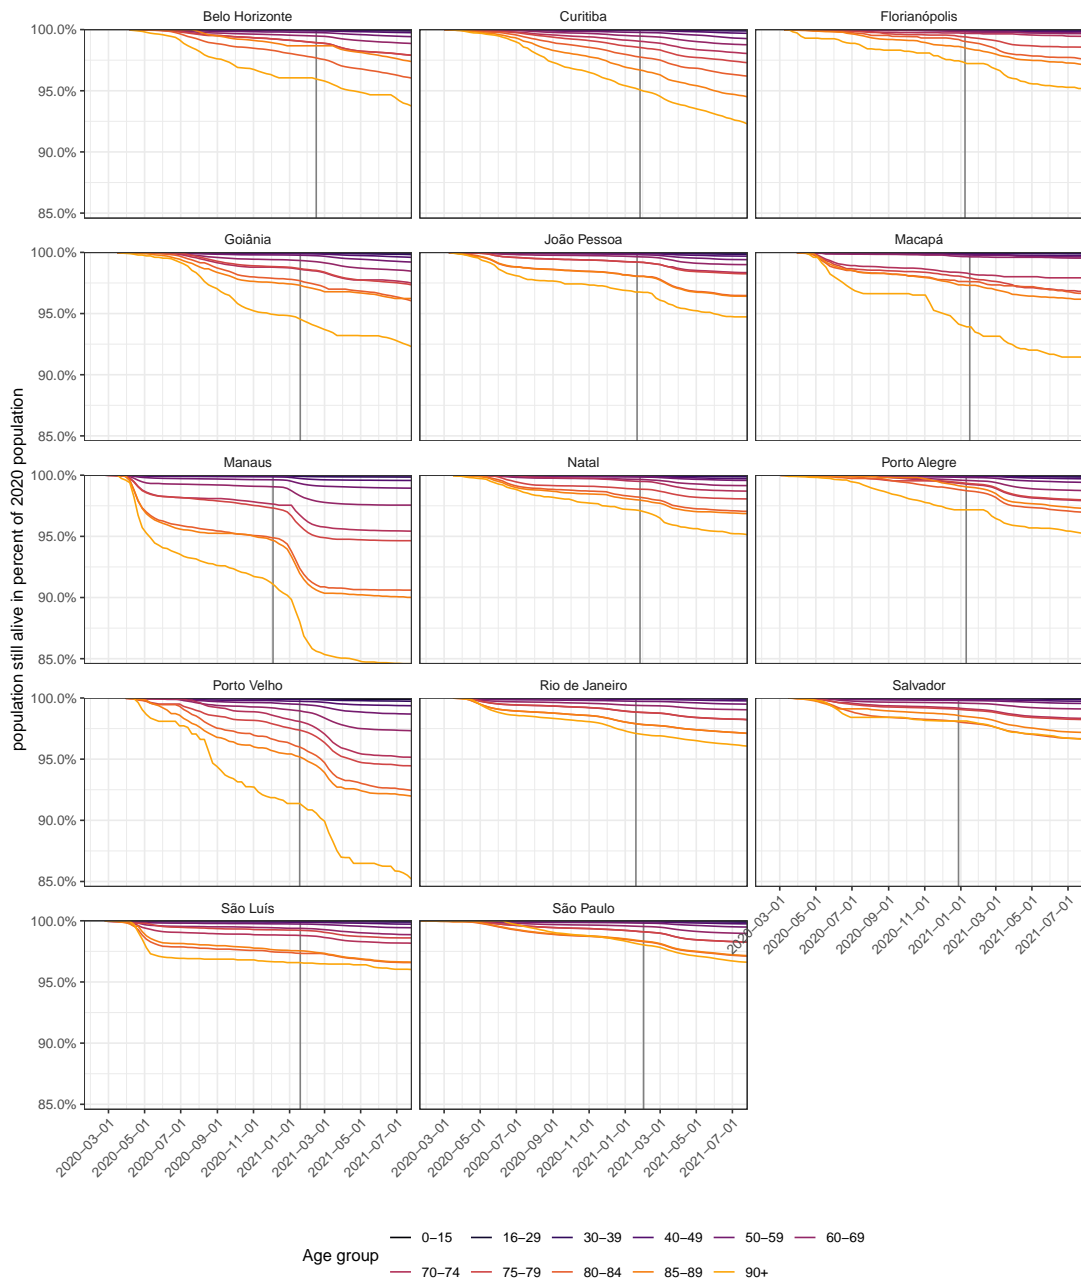

Supplementary Figure S6: Impact of age-specific cumulative mortality on population sizes. For each location, COVID-19 attributable deaths in residents were compared to excess deaths, and the larger of the two were cumulated over weeks for each age band. Shown is the proportion of the age-specific populations still alive by the end of each calendar week. The date of Gamma's detection is shown as grey vertical line.

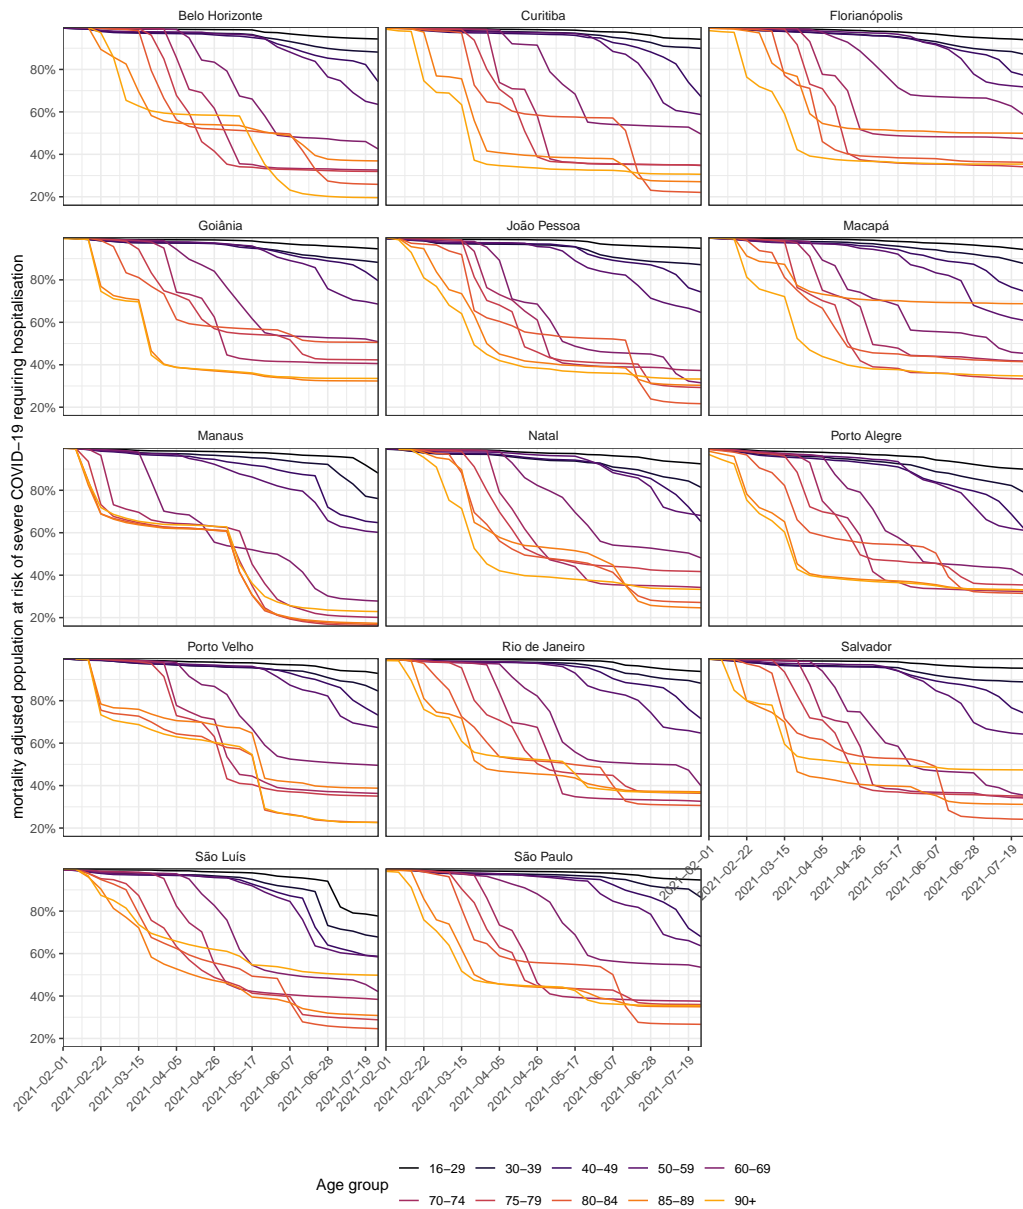

Supplementary Figure S7: Impact of age-specific vaccination rates on population at risk of severe COVID-19 infection. Individual vaccine administration records were for each city aggregated by vaccine, number of doses, week and age band. We then subtracted from the mortality adjusted population size projections a proportion of the vaccinated sub-populations in each age band and week according to the COVID-19 vaccine efficacy estimates in Supplementary Table 7 to estimate the population protected from severe COVID-19 infection and hospitalisation. Shown are the proportions of the mortality adjusted populations in each age band that are estimated to be at risk of severe COVID-19 infection and hospitalisation.

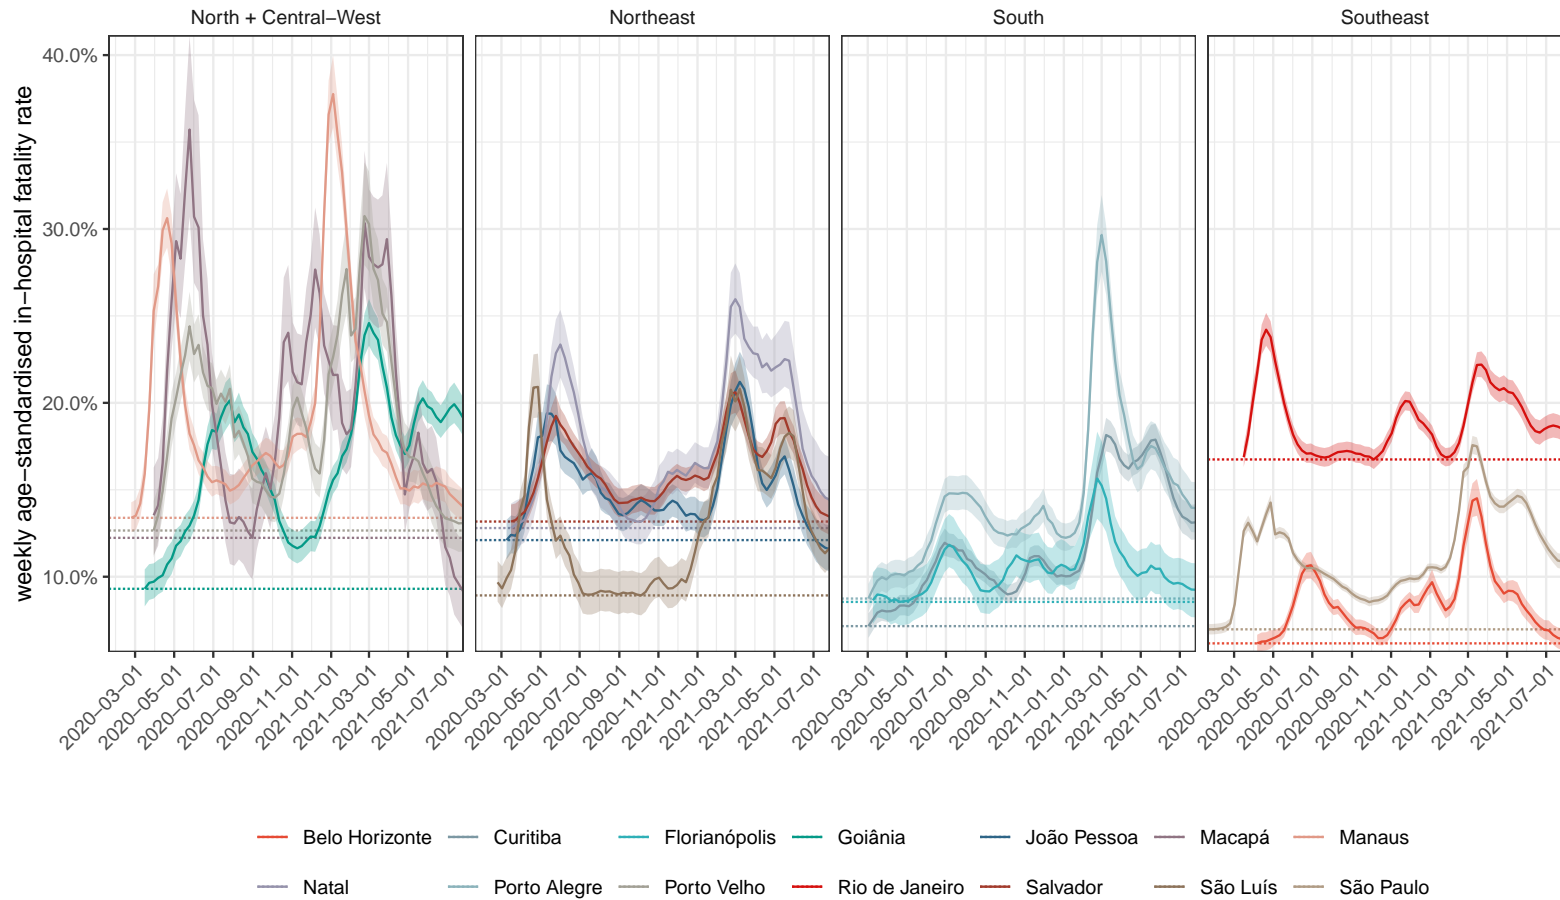

Supplementary Figure S8: Estimated, weekly age-standardised COVID-19 in-hospital fatality rates assuming that all hospitalisations with unreported outcome were discharged. Posterior median estimates (line) are shown with 95%CrIs (ribbon), and the lowest estimated fatality rates during the observation period in each state capital (dotted horizontal line).



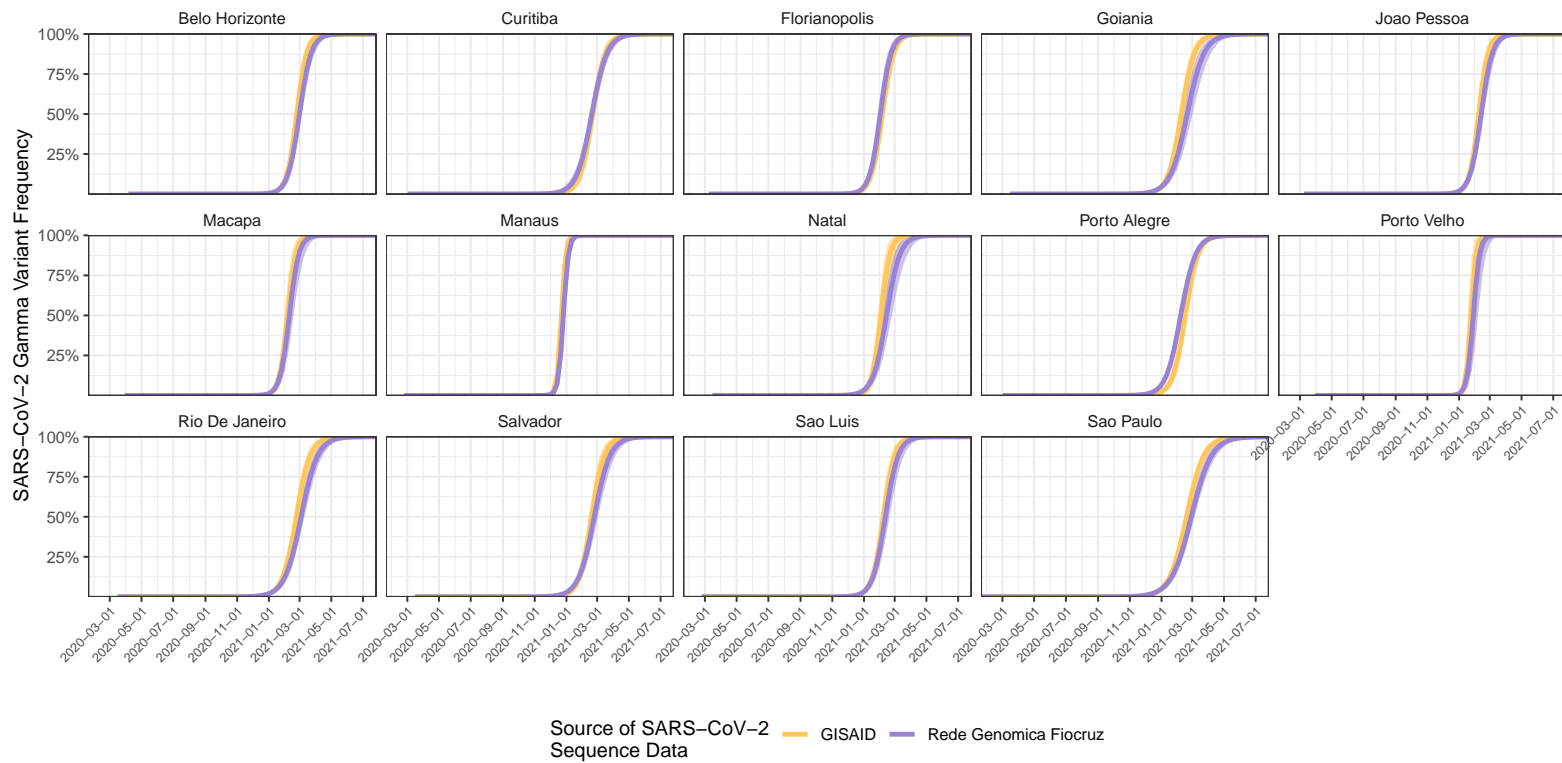

Supplementary Figure S9: Estimated temporal dynamics of Gamma frequency across the 14 cities when using sequence data from Rede Genômica FioCruz. Posterior median estimates (dots) are shown along with 95% credible intervals (linorange) for the central analysis (yellow,  $n=7,221$  samples) and sensitivity analysis (purple,  $n=17,070$  samples).

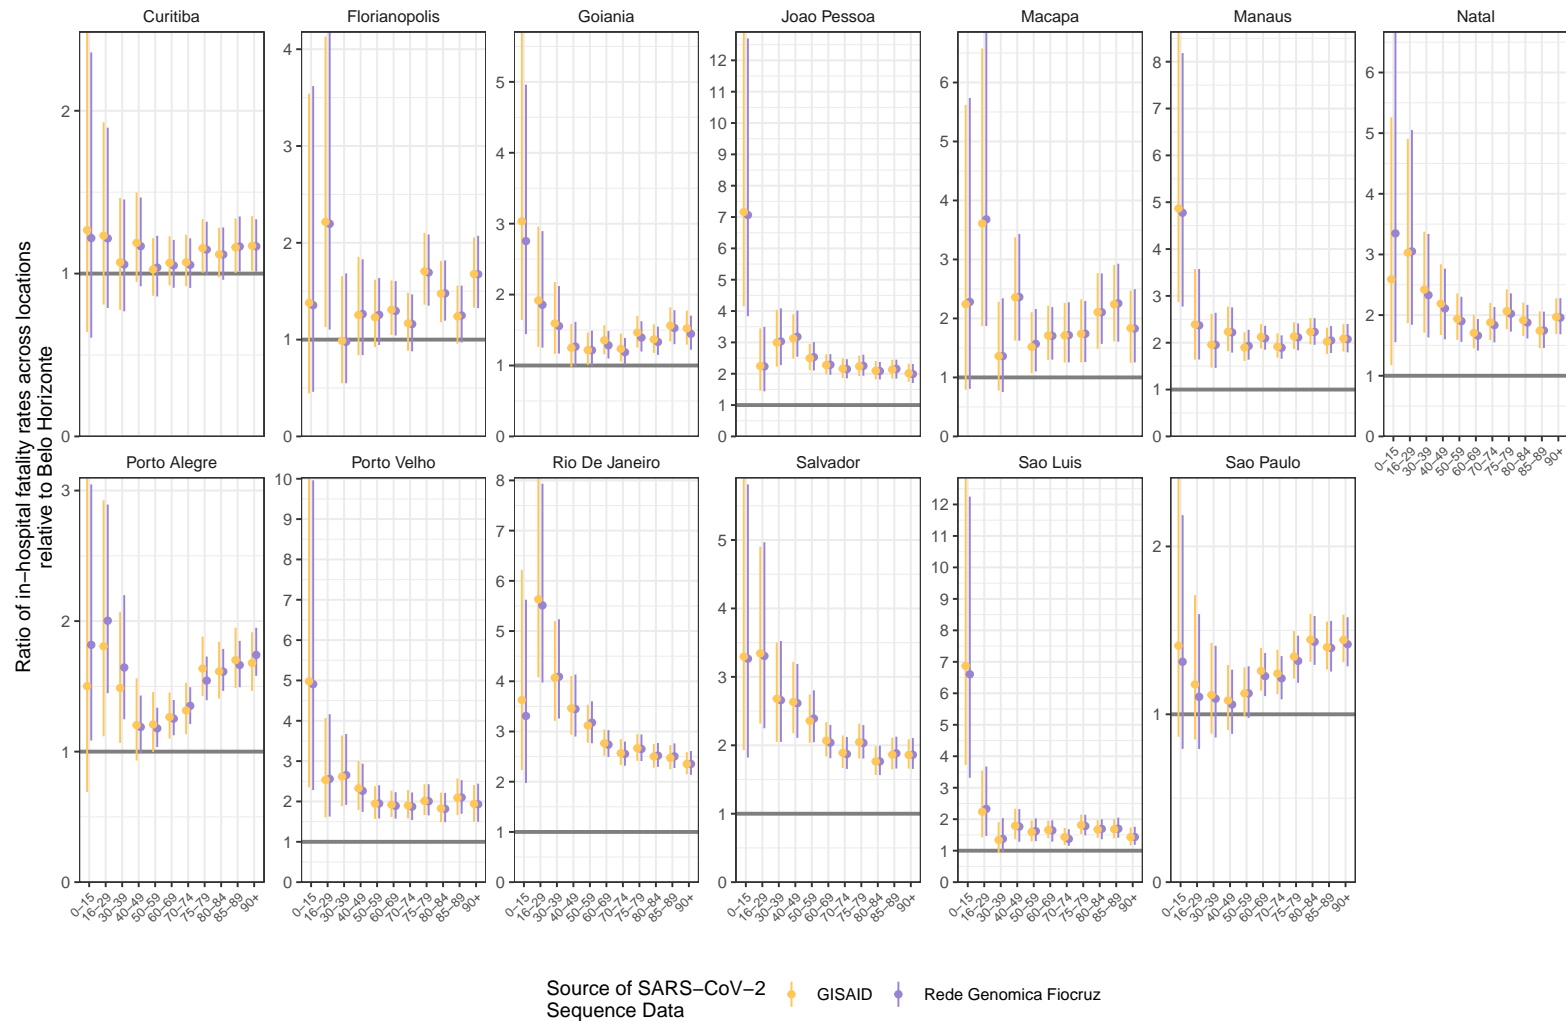

Supplementary Figure S10: Estimated effect of location on in-hospital fatality rates when using sequence data from Rede Genômica FioCruz. Posterior median estimates (dots) are shown along with 95% credible intervals (linerange) for the central analysis (yellow, n=7,221 samples) and sensitivity analysis (purple, n=17,070 samples).

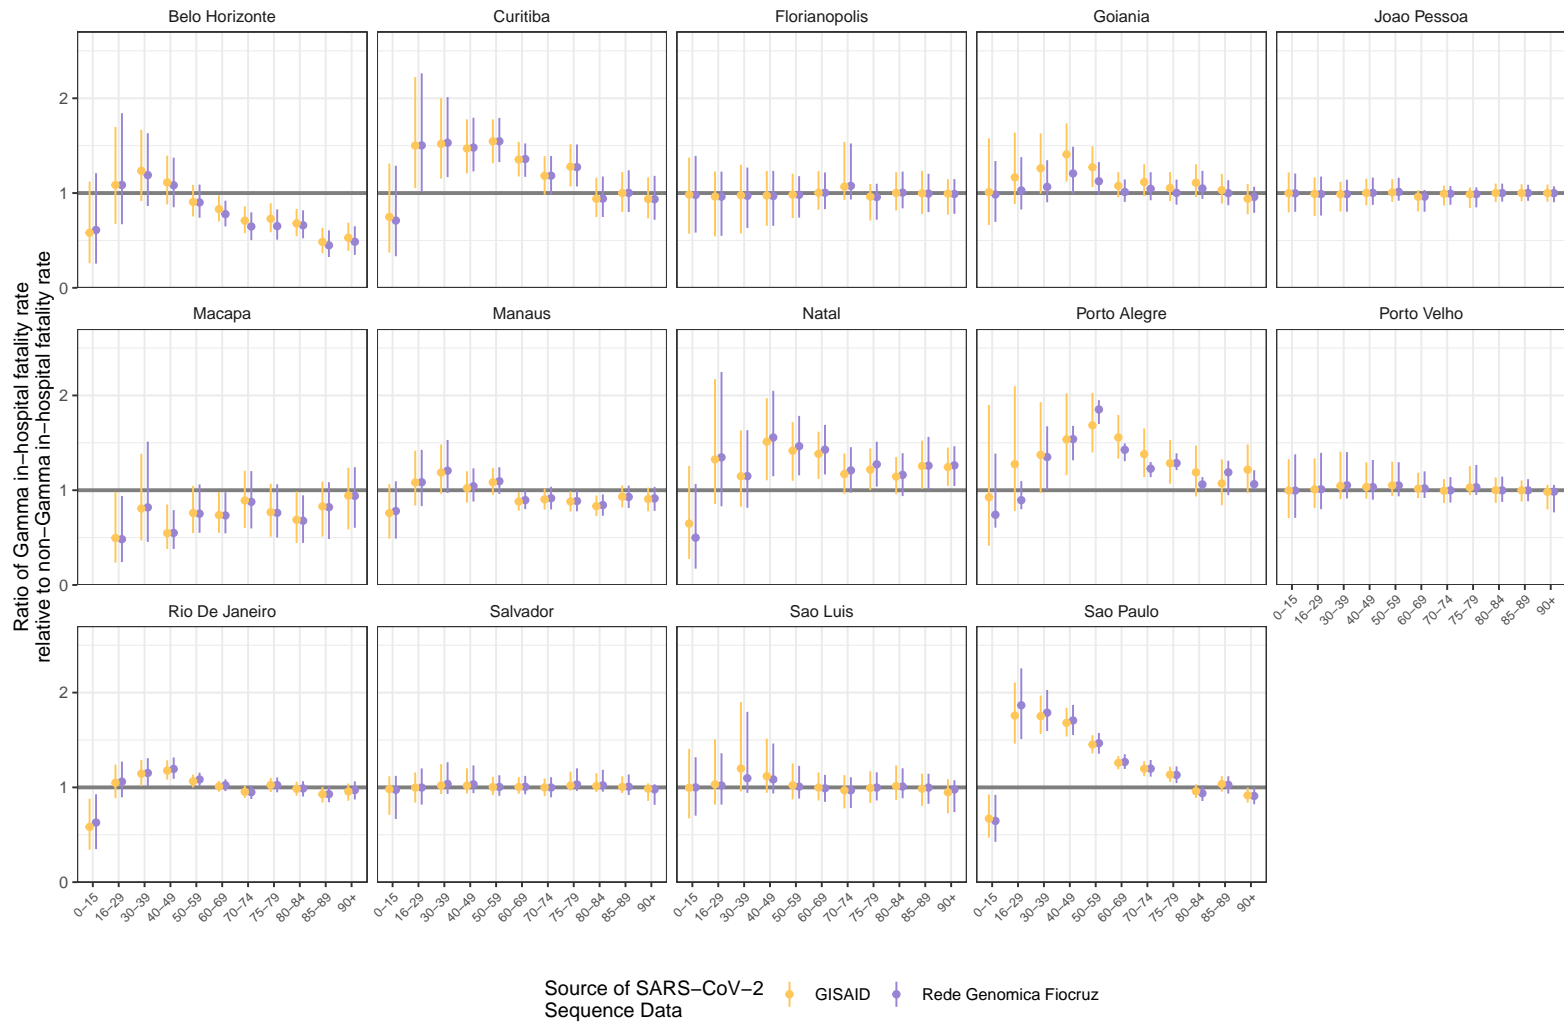

Supplementary Figure S11: Estimated effect of Gamma infection on in-hospital fatality rates when using sequence data from Rede Genômica FioCruz. Posterior median estimates (dots) are shown along with 95% credible intervals (linrange) for the central analysis (yellow, n=7,221 samples) and sensitivity analysis (purple, n=17,070 samples).

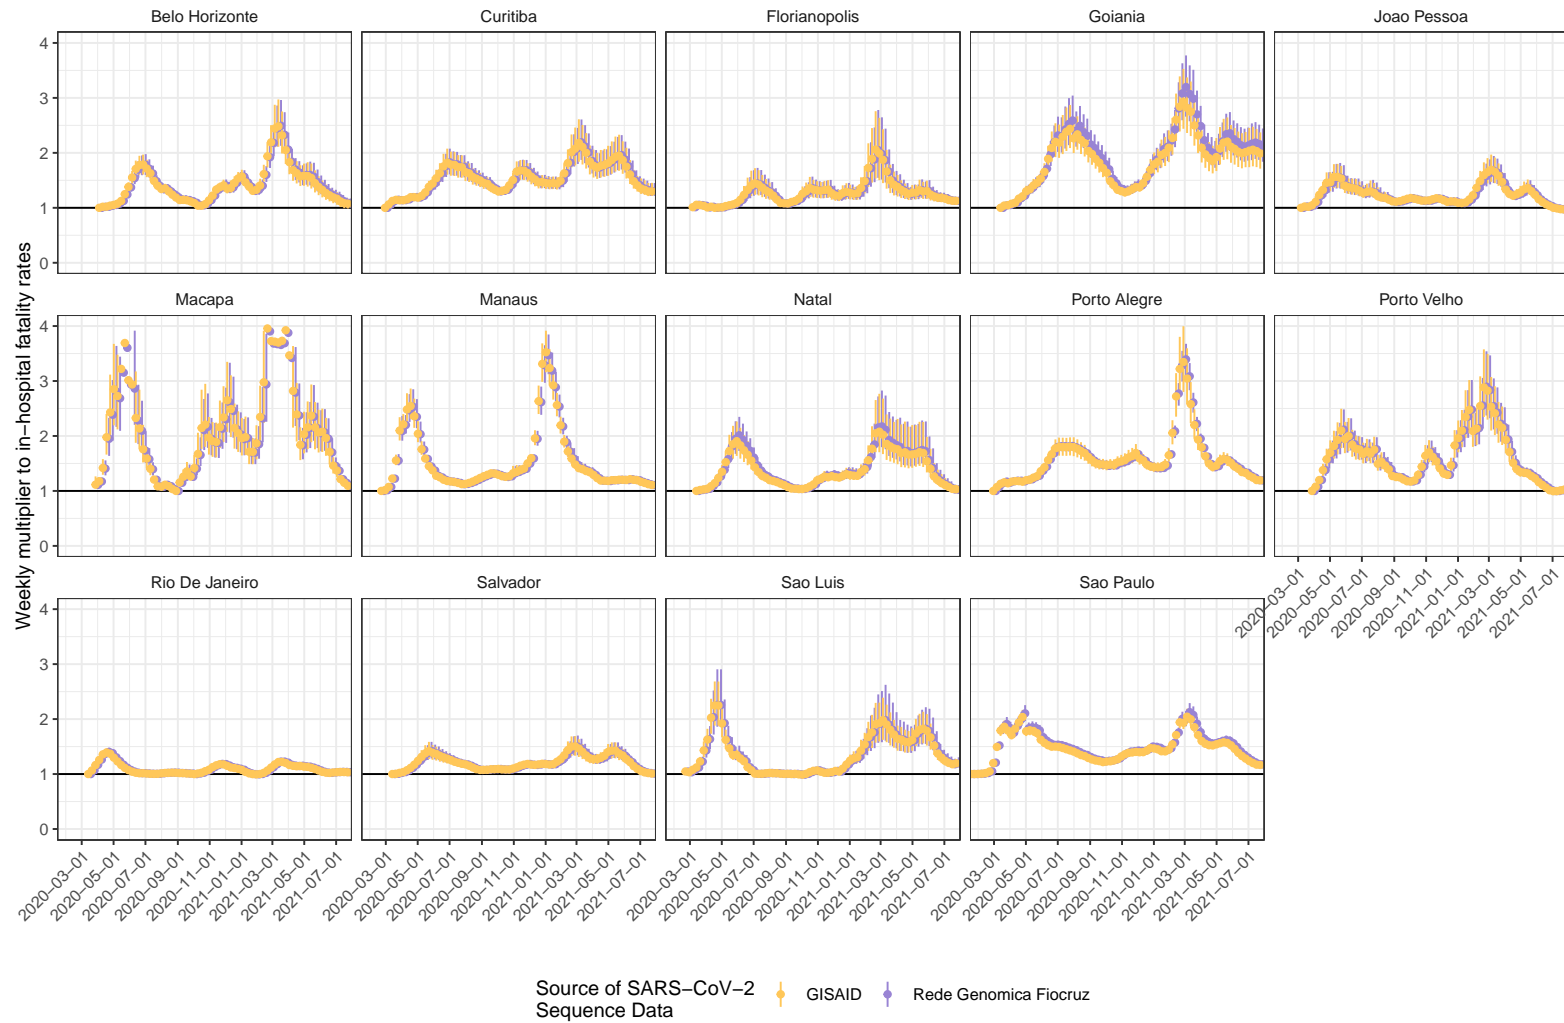

Supplementary Figure S12: Estimated effect of healthcare pressure on in-hospital fatality rates when using sequence data from Rede Genômica FioCruz. Posterior median estimates (dots) are shown along with 95% credible intervals (linrange) for the central analysis (yellow,  $n=3,683$  samples) and sensitivity analysis (purple,  $n=301$  samples).

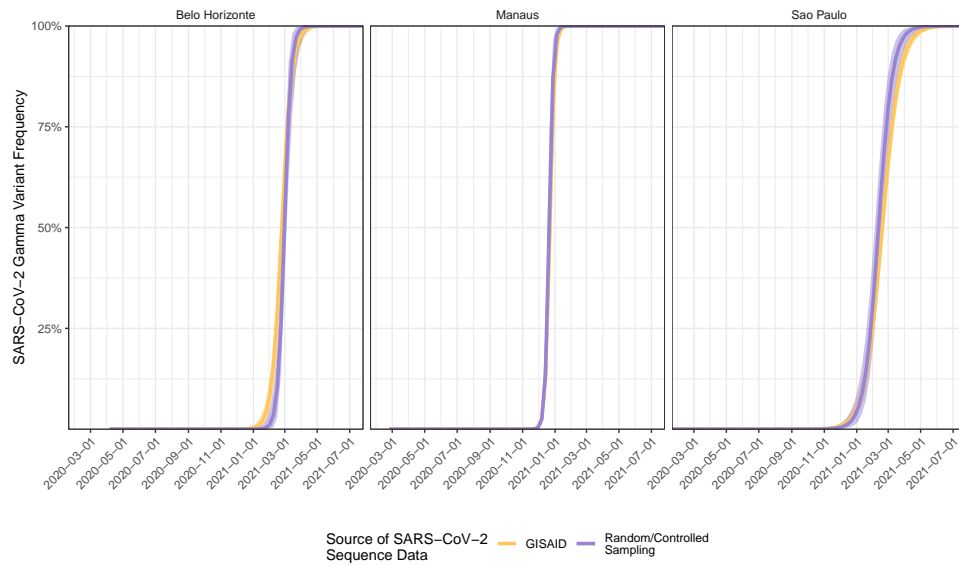

Supplementary Figure S13: Estimated temporal dynamics of Gamma frequency in when using sequence data collected using controlled sampling methodologies. Posterior median estimates (dots) are shown along with 95% credible intervals (line) for the central analysis (yellow) and sensitivity analysis (purple).



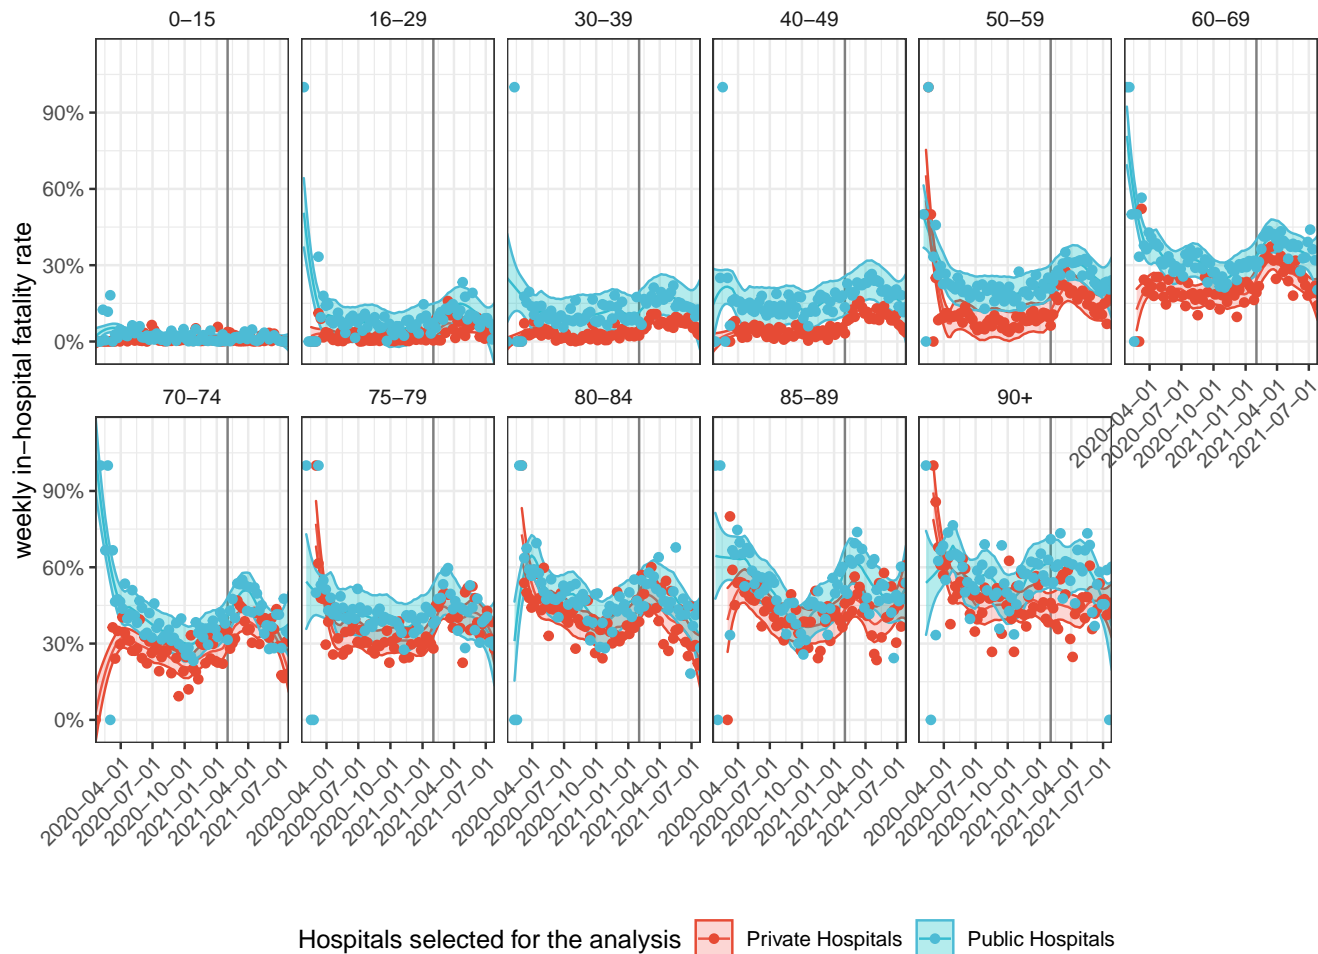

Supplementary Figure S15: Non-parametric estimates of COVID-19 in-hospital fatality rates in public and private hospitals by age group in São Paulo. Nearly all of São Paulo's hospitals could be categorised into public or private healthcare facilities, and COVID-19 in-hospital fatality rates were calculated among unvaccinated patients in public hospitals (blue), and private hospitals (red). Non-parametric, smoothed loess mean estimates (line) are shown with 95% confidence intervals (ribbon). Weekly data are shown as dots, and the date of Gamma's first detection is indicated as a vertical dotted black line.

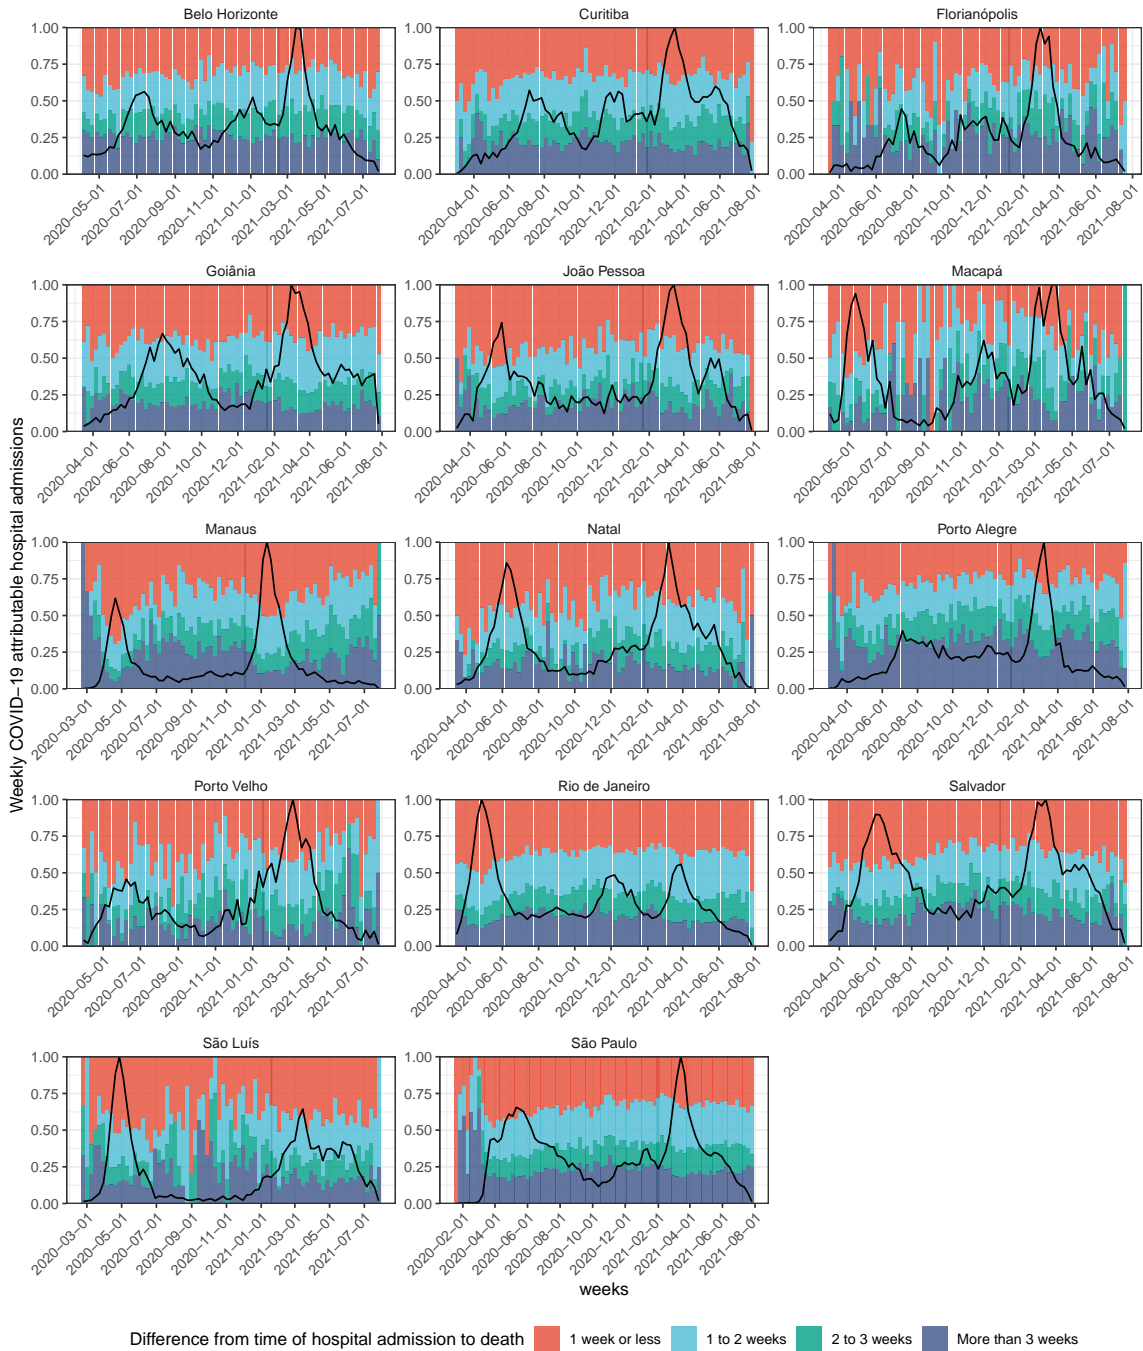

Supplementary Figure S16: Time to death in COVID-19 attributable hospital admissions. Fatalities in weekly COVID-19 attributable hospital admissions were stratified by time to death (1 week or less, 1-2 weeks, 2-3 weeks or more than 3 weeks since admission). We show the proportion of deaths in each time to death stratum (colours). Data for each city are in facets. For reference, the time evolution of weekly hospital admissions is shown with the black line.



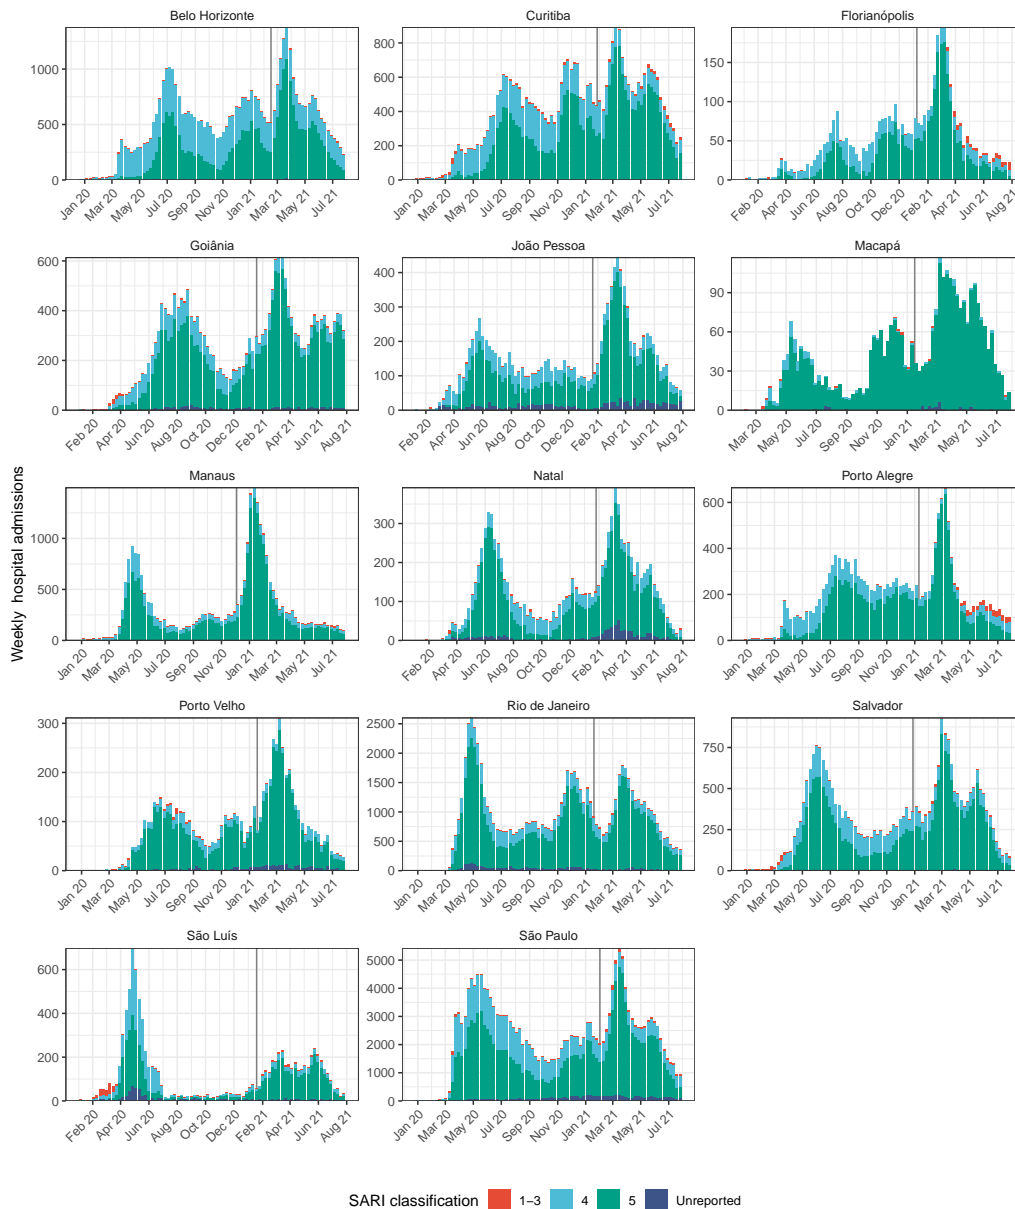

Supplementary Figure S17: Weekly hospital admissions with severe acute respiratory infections in residents without evidence of prior COVID-19 vaccination. Data are shown by week of admission and are stratified by the SIVEP-Gripe classification of severe acute respiratory infections. Classes 1-3 comprise patients with confirmed infection with pathogens other than SARS-CoV-2. Class 4 comprises patients with suspected COVID-19. Class 5 comprises patients with confirmed COVID-19. Patients with unreported diagnosis are shown separately. Data are from the SIVEP-Gripe platform of the Brazilian Ministry of Health and as of 31 January 2022. The grey vertical line indicates the date of Gamma’s first detection in each city.

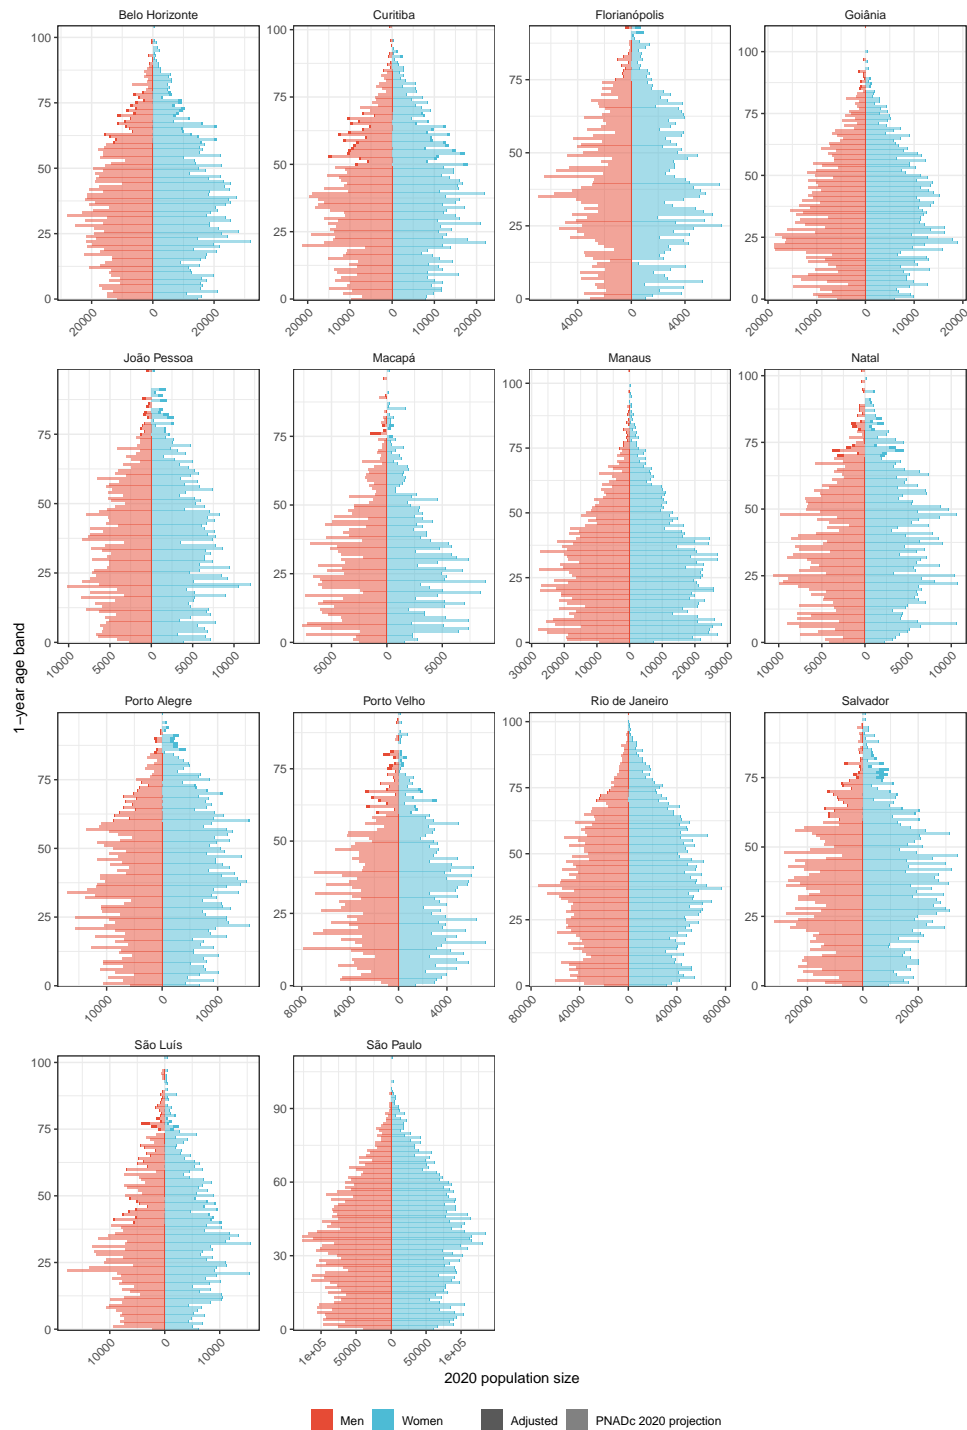

Supplementary Figure S18: 2020 population size projections by sex and 1-year age bands across state capitals and the Federal District. The population size projections were retrieved from the PNAD COVID-19 survey and adjusted to be compatible with vaccine administration records (see Methods).

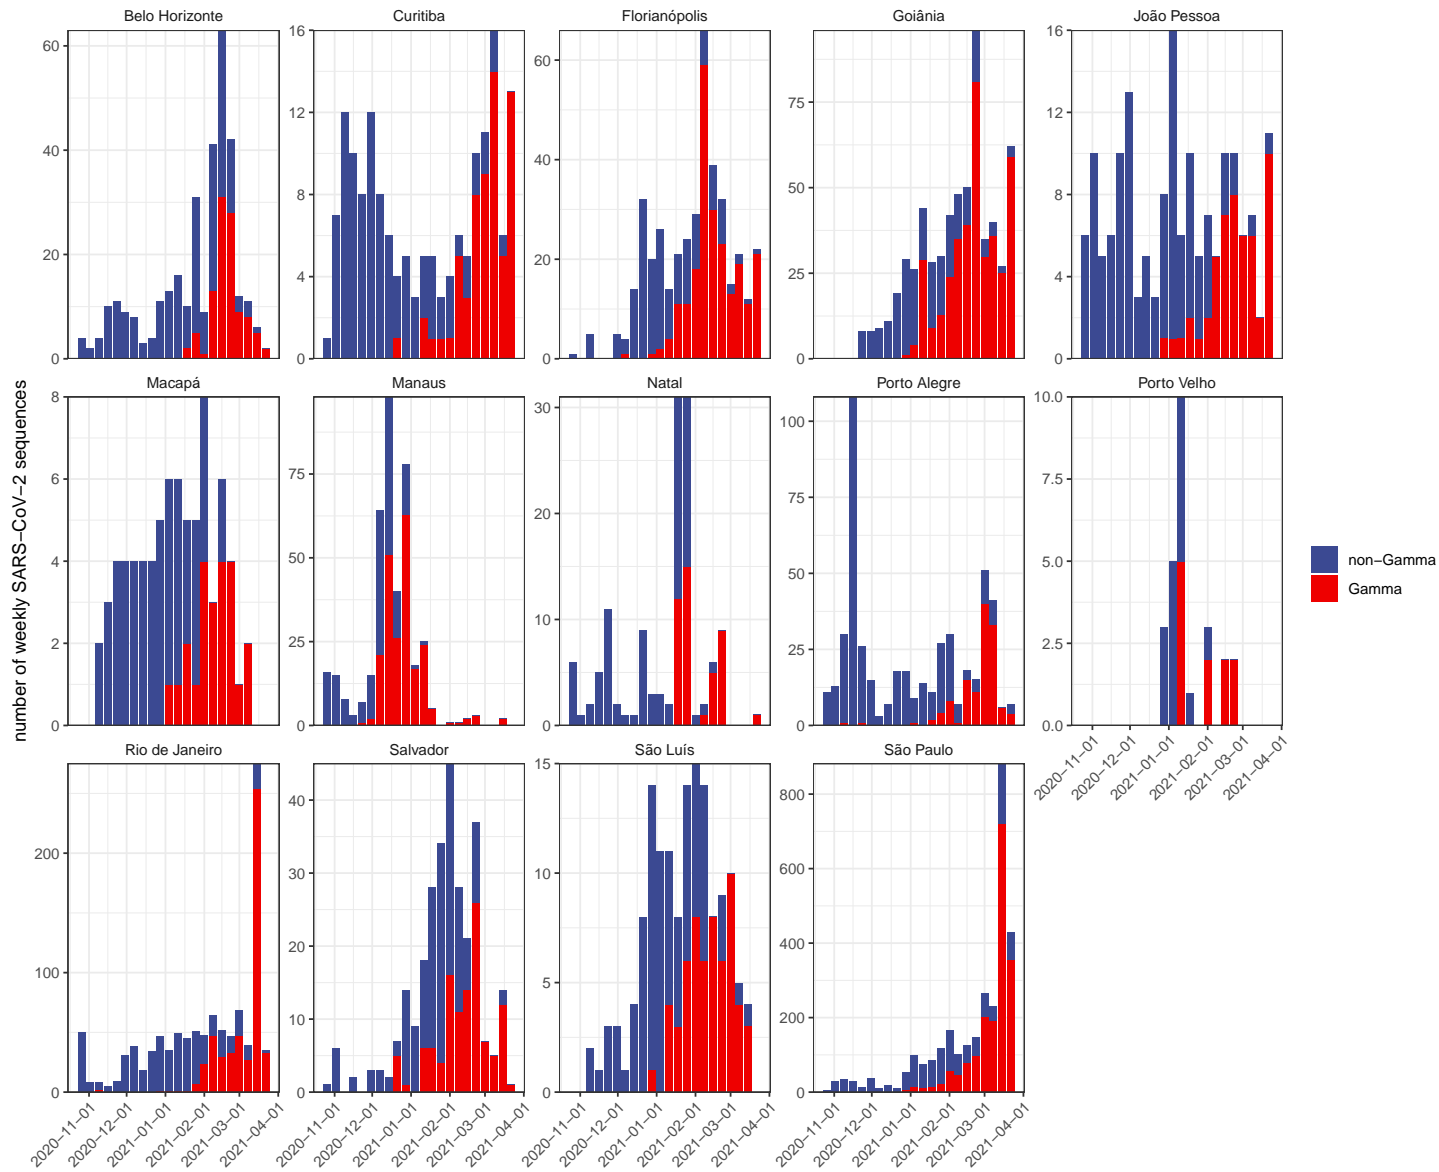

Supplementary Figure S19: SARS-CoV-2 sequence data obtained from GISAID in the 14 states in which the 14 state capitals are located.
